# Supplementary material for: Properties of relativistic electron precipitation: a comparative analysis of wave-induced and field line curvature scattering processes
Source: Frontiers journal article supplement (doi:10.3389/fspas.2024.1495008), 2024-11-08
Supplement: Data_Sheet_1.docx [file Data_Sheet_1.docx]

Supplementary Material

# Supplementary Figures

We show below additional figures in support of the main manuscript.


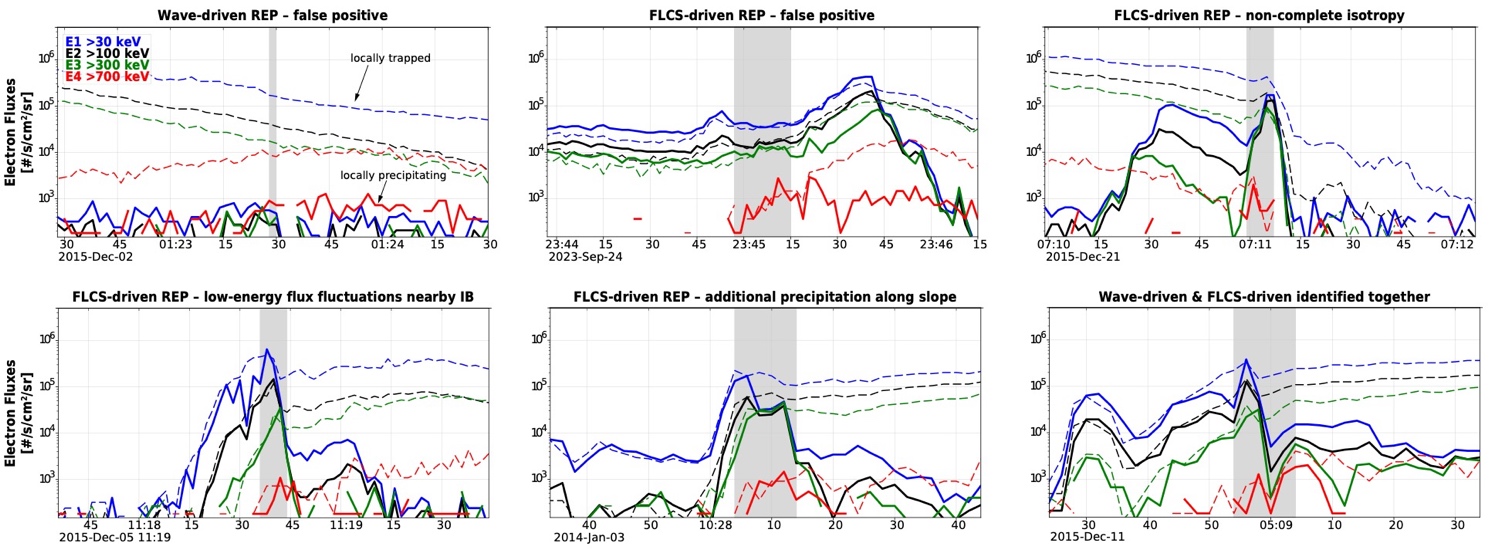


**Supplementary Figure S1.** Examples of discarded events in a similar format as Figure 1 of the main manuscript.

**Supplementary Figure S2.** Event distribution in geographical (top) and magnetic (bottom) coordinates, with histograms reported on the respective axes.


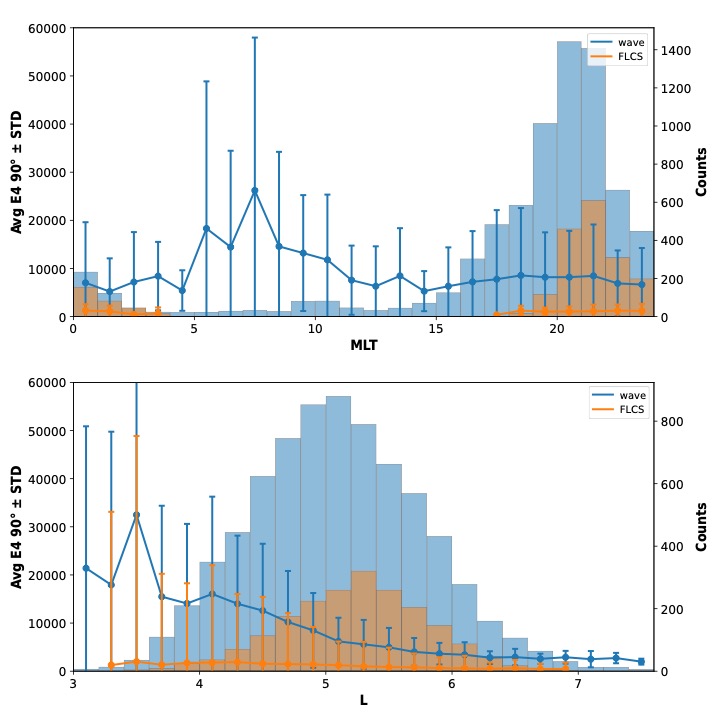


**Supplementary Figure S3.** Trends of the E4 90° electron flux during the precipitation events (left y-axis). The average E4 90° flux for each event is binned in MLT (top, 1 MLT width) and L IGRF (bottom, 1 L width). The circles indicate the average values, and the error bars indicate the standard deviation in each MLT or L bin. Histograms are also illustrated (right y-axis). The blue color is for wave-driven events, the orange is for FLCS-driven events.


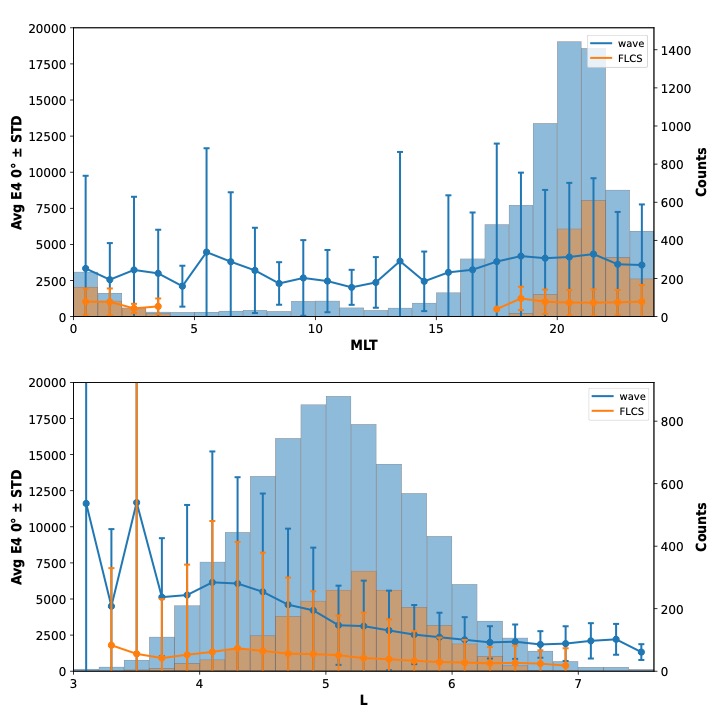


**Supplementary Figure S4.** Trends of the average E4 0° electron flux during the precipitation events in a similar format to **Supplementary Figure S3**.


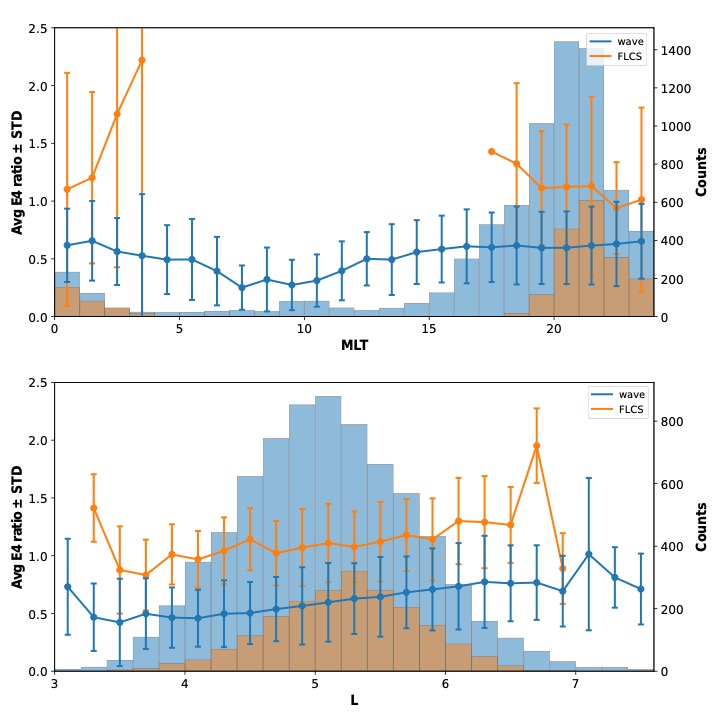


**Supplementary Figure S5.** Trends of the average E4 0°/E4 90° ratio during the precipitation events in a similar format to **Supplementary Figure S3**.


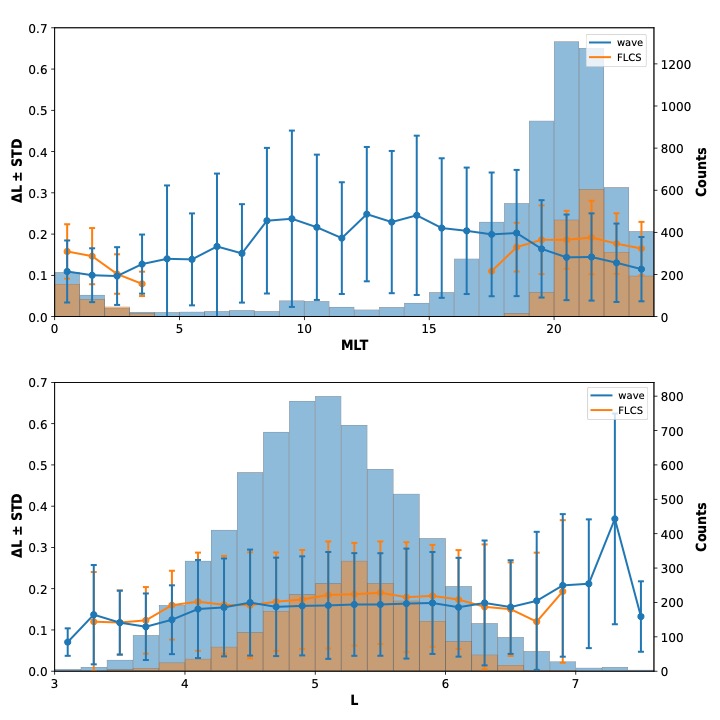


**Supplementary Figure S6.** Trends of the average L shell extent during the precipitation in a similar format to **Supplementary Figure S3**.


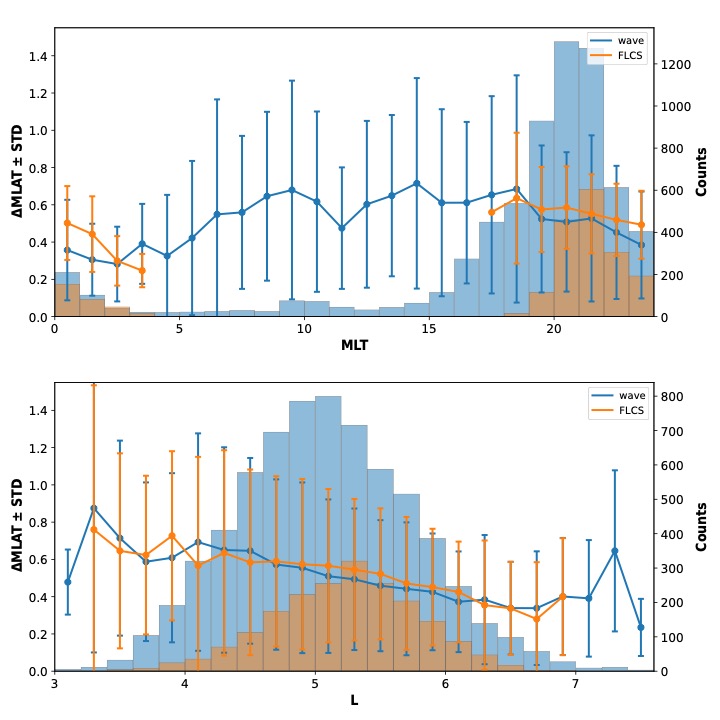


**Supplementary Figure S7.** Trends of the average MLAT extent during the precipitation events in a similar format to **Supplementary Figure S3**.

**Supplementary Figure S8.** Distribution of the events during weak, moderate and strong geomagnetic activity. Numbers in the lower right indicate the number of events.

**
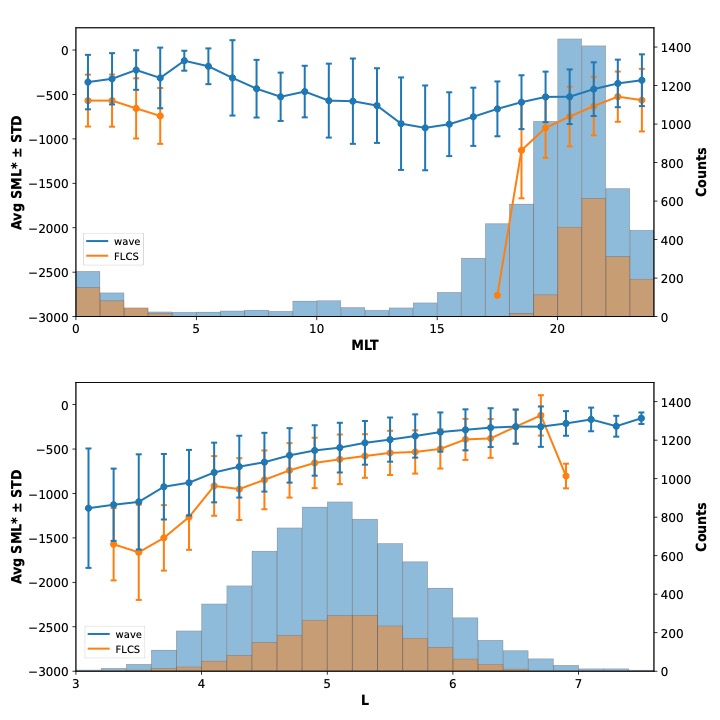
**

**Supplementary Figure S9.** Trends of the average SML* (minimum SML in the 3 hours preceding the REP) during the precipitation events in a similar format to **Supplementary Figure S3**.


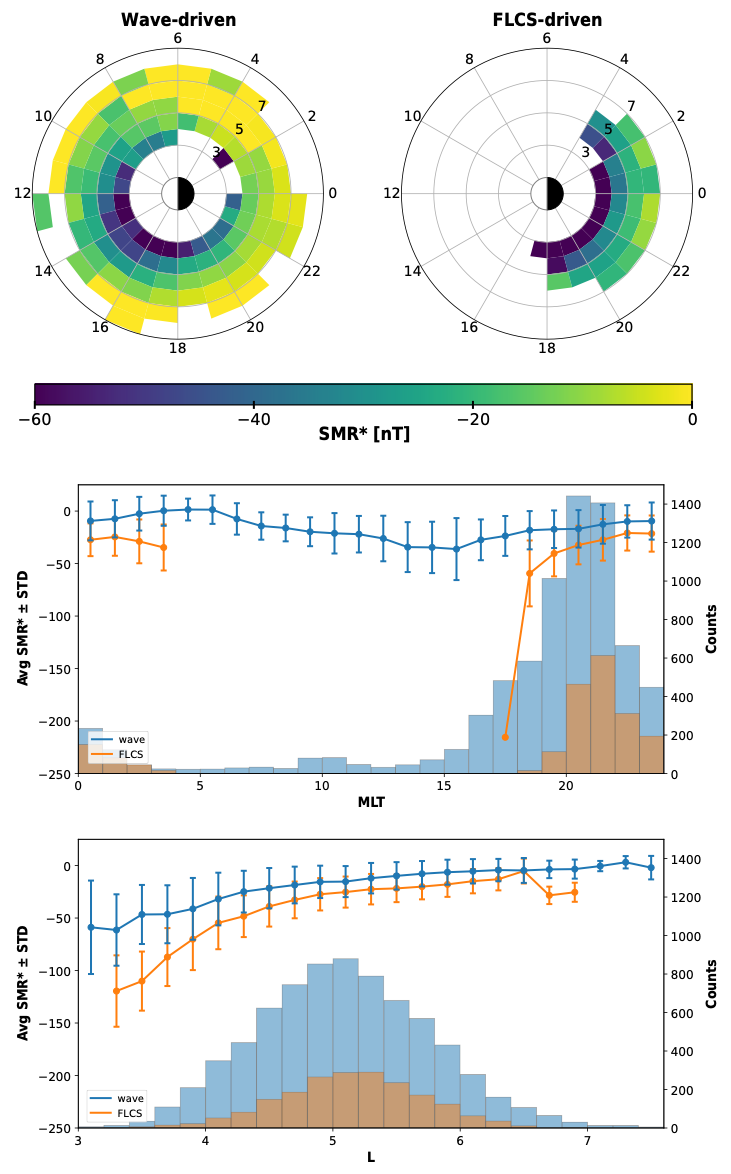


**Supplementary Figure S10.** Binned plot of the minimum SMR in the 3-h prior the REP UT (i.e., SMR*) on the top. Bottom panels are in a similar format to **Supplementary Figure S3**.

# Supplementary Tables

**Supplementary Table S1.** Overview of the events identified by the deep learning (DL) model (“All”) and flagged as “Ideal” (flag=0), “Discarded” (flag=1), “Merged” (flag=2), “Merged & Misclassified” (flag=23), and “Misclassified” (flag=3). The “Performance” approximately estimates the performance of the DL model together with our visual inspection and it represents the percentage of events included in the analysis out of all events identified by the DL model. Note that we are only including events that clearly belong to one category and discard ambiguous and false positive events (see main manuscript for additional details). Wave-driven REP is marked in blue, FLCS-driven REP is indicated in orange.

| **Year** | **Flag** | **2012** | **2013** | **2014** | **2015** | **2016** | **2017** | **2018** | **2019** | **2020** | **2021** | **2022** | **2023** | **Tot** |
| --- | --- | --- | --- | --- | --- | --- | --- | --- | --- | --- | --- | --- | --- | --- |
| **All** | - | 316 | 681 | 278 | 1,063 | 1,472 | 2,051 | 758 | 772 | 426 | 780 | 986 | 527 | 10,110 |
| **All** | - | 220 | 891 | 539 | 1,527 | 1,795 | 1845 | 721 | 791 | 562 | 864 | 1,692 | 1,038 | 12,485 |
| **Ideal** | 0 | 121 | 494 | 190 | 705 | 997 | 968 | 558 | 573 | 326 | 571 | 684 | 361 | 6,548 |
| **Ideal** | 0 | 32 | 216 | 123 | 186 | 269 | 273 | 116 | 120 | 86 | 135 | 279 | 167 | 2,002 |
| **Discarded** | 1 | 193 | 158 | 80 | 306 | 427 | 1,041 | 174 | 185 | 90 | 187 | 274 | 145 | 3,260 |
| **Discarded** | 1 | 185 | 583 | 388 | 1196 | 1,393 | 1,460 | 544 | 638 | 443 | 664 | 1,333 | 789 | 9,616 |
| **Merged** | 2 | 2 | 24 | 7 | 51 | 47 | 40 | 25 | 14 | 10 | 22 | 28 | 20 | 290 |
| **Merged** | 2 | 0 | 4 | 1 | 0 | 0 | 4 | 1 | 0 | 0 | 0 | 0 | 0 | 10 |
| **Merged & Misclassified** | 23 | 0 | 4 | 1 | 0 | 0 | 1 | 1 | 0 | 0 | 0 | 0 | 0 | 7 |
| **Merged & Misclassified** | 23 | 1 | 24 | 7 | 49 | 47 | 37 | 25 | 12 | 10 | 22 | 28 | 20 | 282 |
| **Misclassified** | 3 | 0 | 1 | 0 | 1 | 1 | 1 | 0 | 0 | 0 | 0 | 0 | 1 | 5 |
| **Misclassified** | 3 | 2 | 64 | 20 | 95 | 86 | 71 | 35 | 21 | 23 | 43 | 52 | 62 | 574 |
| **Performance**  **(% of ideal events)** | - | 39.2% | 85.5% | 78.1% | 79.9% | 76.7% | 52.5% | 81.5% | 78.5% | 84.3% | 81.5% | 77.5% | 84.1% | 73.2% |
| **Performance**  **(% of ideal events)** | - | 14.5% | 12.8% | 23.0% | 12.3% | 15.0% | 14.9% | 16.2% | 15.2% | 15.3% | 15.6% | 16.5% | 16.1% | 16.1% |
